# Supplementary material
Source: PubMed Central journal article supplement (PMC10123174)
Supplement: NIHMS1844926-supplement-supinfo.pdf [file NIHMS1844926-supplement-supinfo.pdf]

# Figure S1 (Fujihara et al.)

A

|                   |     |            |                |             |             |            |            |
|-------------------|-----|------------|----------------|-------------|-------------|------------|------------|
| H. sapiens PDCL2  | 1   | MQDPNEDTEW | NILRDFGILPPKEE | SKDEIEEMVLR | LQEQEAMVKP  | FEKMT      | 50         |
| M. musculus PDCL2 | 1   | MQDPNEDTEW | NEILRNF        | FGILPPKEE   | PKDEIEEMVLR | LQEQEAMVKP | YEKMT 50   |
| H. sapiens PDCL2  | 51  | LAQLKEAEDE | FDEEDMCAVE     | TYRKRRLQEW  | KALKKKKQ    | KFGELREIS  | GNQY 100   |
| M. musculus PDCL2 | 51  | LAQLKEAEDE | FDEEDIKAI      | EIYREKRLQEW | KALKKKKQ    | KFGELREIS  | GNQY 100   |
| H. sapiens PDCL2  | 101 | VNEVTNAE   | KDLWVVIHLYR    | SSVPMCLLVN  | QHLSVLARK   | FPETK      | FVKAI 150  |
| M. musculus PDCL2 | 101 | VNEVTNAE   | KDLWVVIHLYR    | SSVPMCLLVN  | QHLSV       | LARKFPET   | KFVKAI 150 |
| H. sapiens PDCL2  | 151 | SCIEHYHDN  | CLPTIFVYK      | NGQIEGK     | FIGIIECGG   | INLKL      | EELEW 200  |
| M. musculus PDCL2 | 151 | SCIEHYHDN  | CLPTIFVYK      | NGQIEG      | KFIGIIECGG  | INLKL      | EELEW 200  |
| H. sapiens PDCL2  | 201 | AIQSDLEEN  | PKKGIADMM      | VSSIRN      | TSIYDSD     | SSSG       | SDTEAK 241 |
| M. musculus PDCL2 | 201 | AIQSDLEEN  | PKKGIADMM      | VSSIRN      | TSIYDSD     | SSSG       | SDTEAK 240 |

B

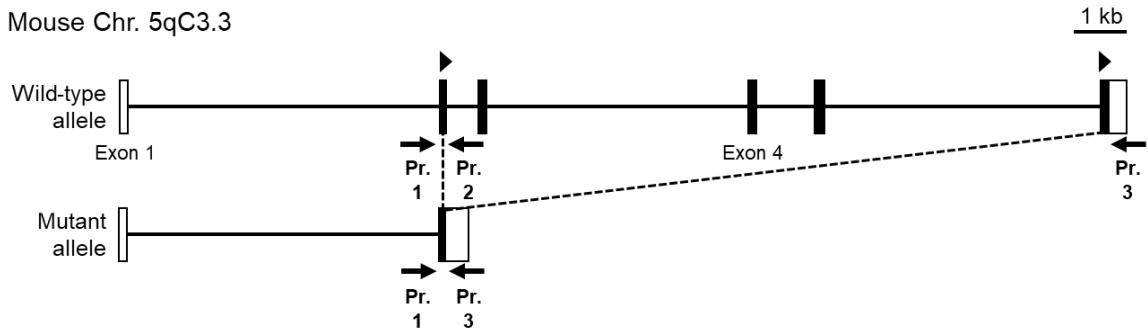

C

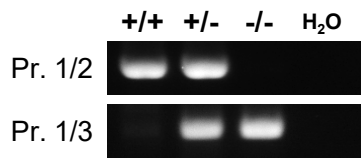

D

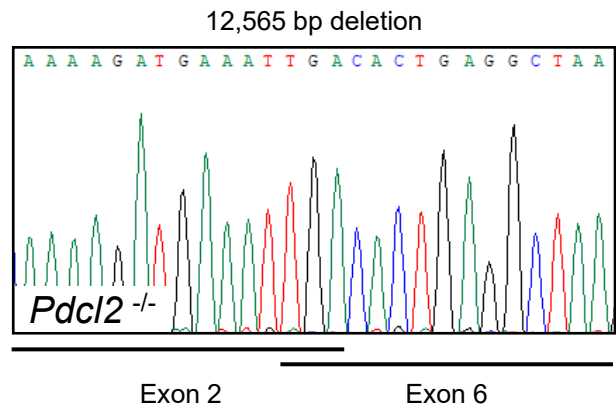

E

|                      |     |            |             |            |             |            |            |
|----------------------|-----|------------|-------------|------------|-------------|------------|------------|
| PDCL2 wild-type mice | 1   | MQDPNEDTEW | NEILRNF     | FGILPPKEE  | PKDEIEEMVLR | LQEQEAMVKP | YEKMT 50   |
| PDCL2 mutant mice    | 1   | MQDPNEDTEW | NEILRNF     | FGILPPKEE  | PKDEI       | DTEAK----- | 35         |
| PDCL2 wild-type mice | 51  | LAQLKEAEDE | FDEEDMCAVE  | TYRKRRLQEW | KALKKKKQ    | KFGELREIS  | GNQY 100   |
| PDCL2 mutant mice    | 35  | -----      | -----       | -----      | -----       | -----      | 35         |
| PDCL2 wild-type mice | 101 | VNEVTNAE   | KDLWVVIHLYR | SSVPMCLLVN | QHLSVLARK   | FPETK      | FVKAI 150  |
| PDCL2 mutant mice    | 35  | -----      | -----       | -----      | -----       | -----      | 35         |
| PDCL2 wild-type mice | 151 | SCIEHYHDN  | CLPTIFVYK   | NGQIEGK    | FIGIIECGG   | INLKL      | EELEW 200  |
| PDCL2 mutant mice    | 35  | -----      | -----       | -----      | -----       | -----      | 35         |
| PDCL2 wild-type mice | 201 | AIQSDLEEN  | PKKGIADMM   | VSSIRN     | TSIYDSD     | SSSG       | SDTEAK 240 |
| PDCL2 mutant mice    | 35  | -----      | -----       | -----      | -----       | -----      | 35         |

**Figure S1: Generation of *Pdc12*<sup>-/-</sup> mice via the CRISPR-Cas9 system**

(A) Amino acid sequence similarity of PDCL2 in mice and humans. 87.5% of the sequence (210/240 amino acids) is identical. (B) Schematic of the *Pdc12* locus and CRISPR-Cas9 targeting scheme. Arrows represent primers. (C) Genotyping *Pdc12*<sup>-/-</sup> mice via PCR amplification. *Pdc12*<sup>-/-</sup> mice had an amplified band using primers 1 and 3. (D) Wave pattern sequence of the *Pdc12* mutant allele (12,565 bp deletion) in *Pdc12*<sup>-/-</sup> mice. (E) Amino acid sequence of *Pdc12*<sup>-/-</sup> mice. The 12,565 bp deletion caused a 205 (out of 240) amino acid deletion.

# Figure S2 (Fujihara et al.)

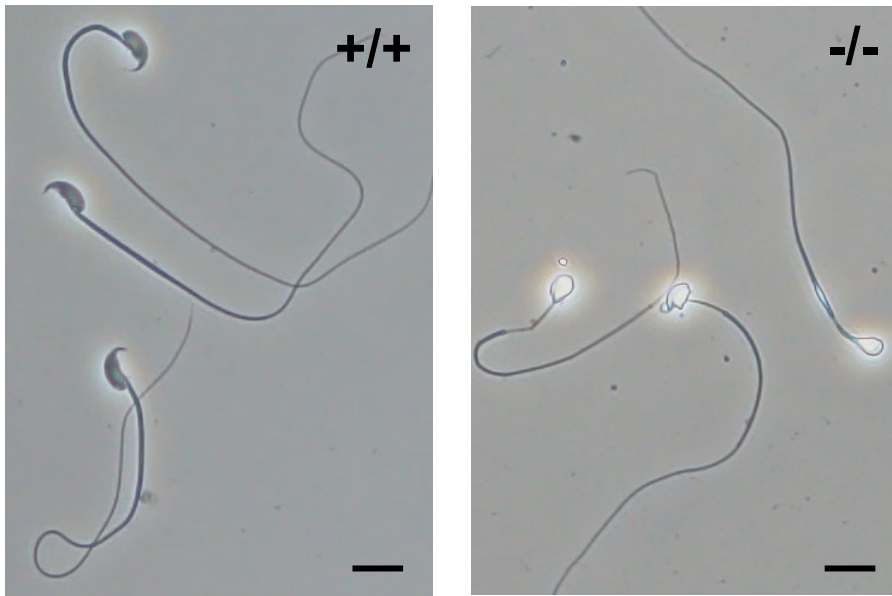

**Figure S2: Phase-contrast microscopy of spermatozoa from the cauda epididymis**  
Scale bars: 10  $\mu\text{m}$ .
